# Supplementary material for: Optimization of toxic metal adsorption on DEA-calix[4]arene appended silica resin using a central composite design
Source: Royal Society of Chemistry journal article supplement (doi:10.1039/d1nj05669g), 2022-01-01
Supplement: d1nj05669g1.pdf [file d1nj05669g1.pdf]

## Optimization of toxic metals adsorption on DEA-calix[4]arene appended silica resin using central composite design

Samiha Gul<sup>a</sup>, Fakhar N. Memon<sup>b\*</sup>, Shahabuddin Memon<sup>a</sup>

<sup>a</sup>National Center of Excellence in Analytical Chemistry, University of Sindh, Jamshoro 76080, Pakistan

<sup>b</sup>Department of Chemistry, University of Karachi, Karachi 75270, Pakistan

\*Corresponding Author

Email address: [fakhar.nisa@uok.edu.pk](mailto:fakhar.nisa@uok.edu.pk), [fakhar\\_memon2@yahoo.com](mailto:fakhar_memon2@yahoo.com) (Fakhar N. Memon).

### Supplementary Figures

- Fig. 1. Response surface plots of desirability for the effects of pH, adsorbent Dosage and metal ion concentration on the % adsorption of  $Pb^{2+}$
- Fig. 2. Response surface plots of desirability for the effects of pH, adsorbent Dosage and metal ion concentration on the % adsorption of  $Cd^{2+}$
- Fig. 3. Response surface plots of desirability for the effects of pH, adsorbent Dosage and metal ion concentration on the % adsorption of  $Hg^{2+}$
- Fig. 4. Langmuir adsorption isotherm of  $Pb^{2+}$ ,  $Cd^{2+}$  and  $Hg^{2+}$  on DEA- C4 resin.
- Fig. 5. Freundlich adsorption isotherm of  $Pb^{2+}$ ,  $Cd^{2+}$  and  $Hg^{2+}$  on DEA- C4 resin
- Fig. 6(a) Lagergren model for % adsorption of  $Pb^{2+}$ ,  $Cd^{2+}$  and  $Hg^{2+}$
- Fig. 6(b) Ho and Mckay model for % adsorption of  $Pb^{2+}$ ,  $Cd^{2+}$  and  $Hg^{2+}$
- Fig. 6(c) Morris Weber model for % adsorption of  $Pb^{2+}$ ,  $Cd^{2+}$  and  $Hg^{2+}$
- Fig. 7. Effect of temperature on the % adsorption of  $Pb^{2+}$ ,  $Cd^{2+}$  and  $Hg^{2+}$ .

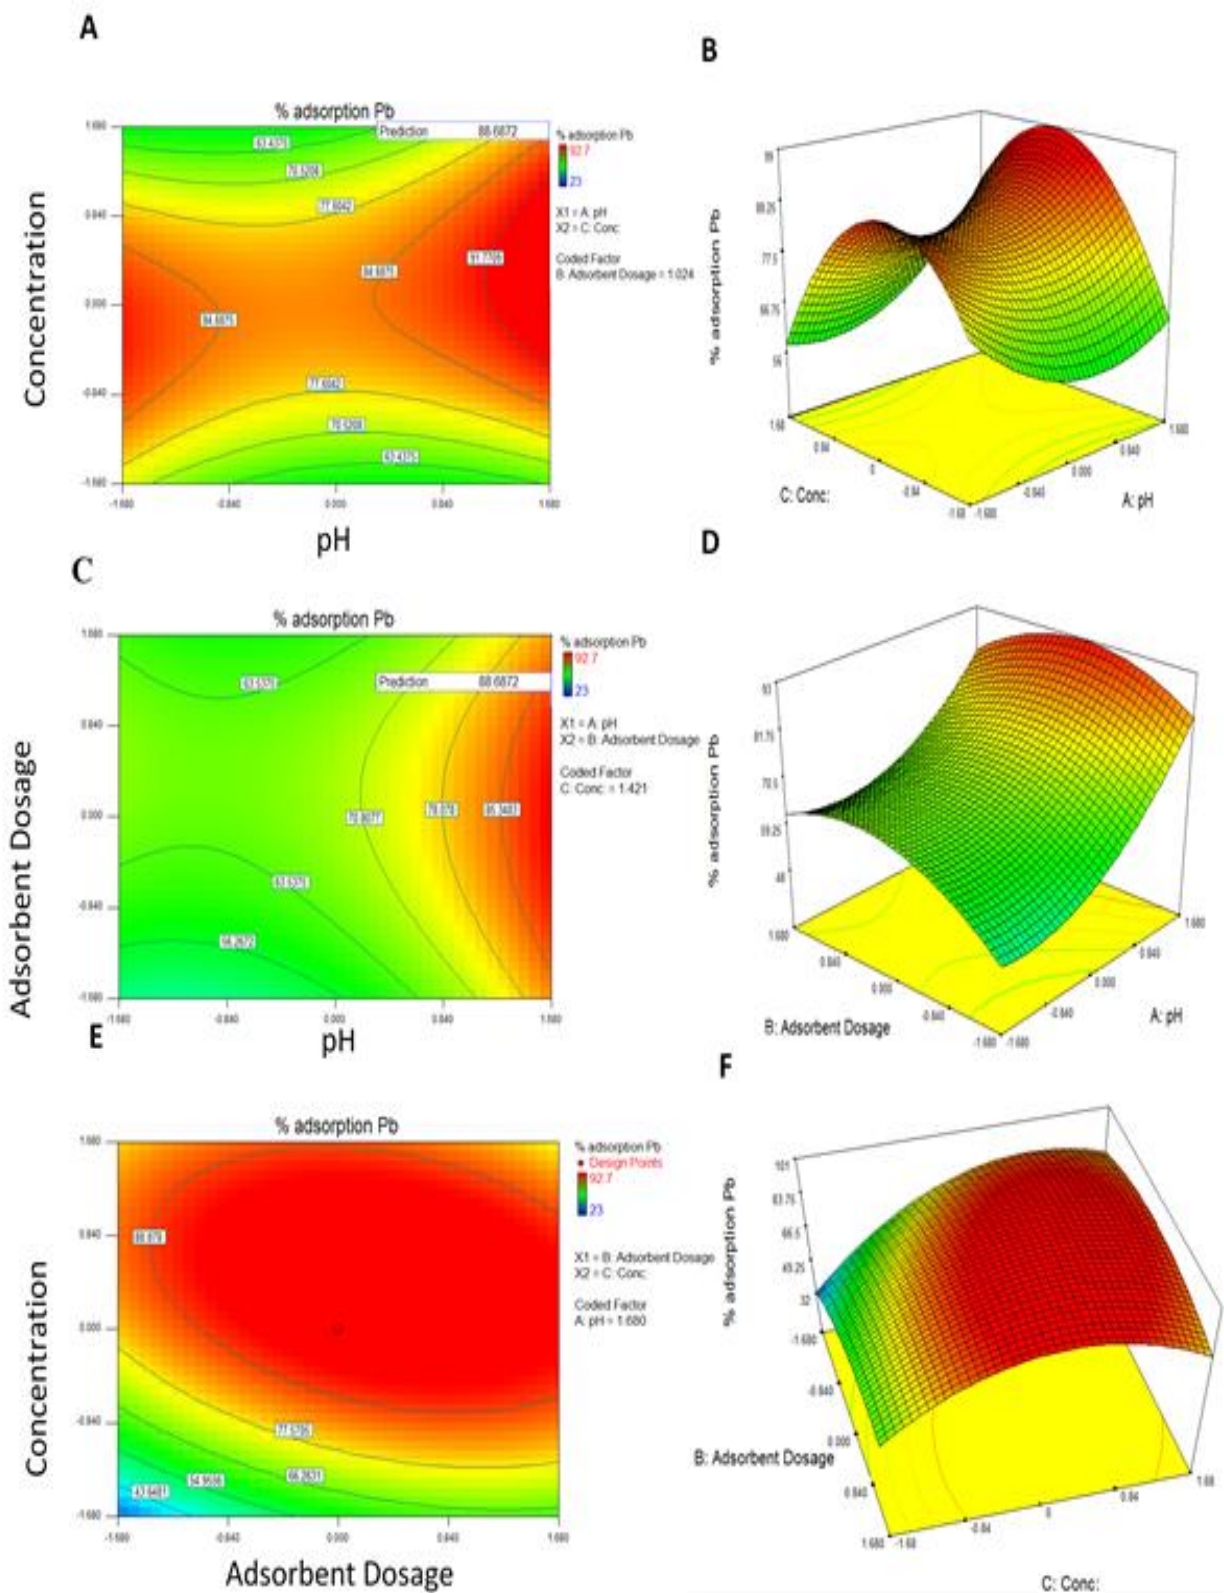

Fig. 1. Response surface plots of desirability for the effects of pH, adsorbent Dosage and metal ion concentration on the % adsorption of  $Pb^{2+}$

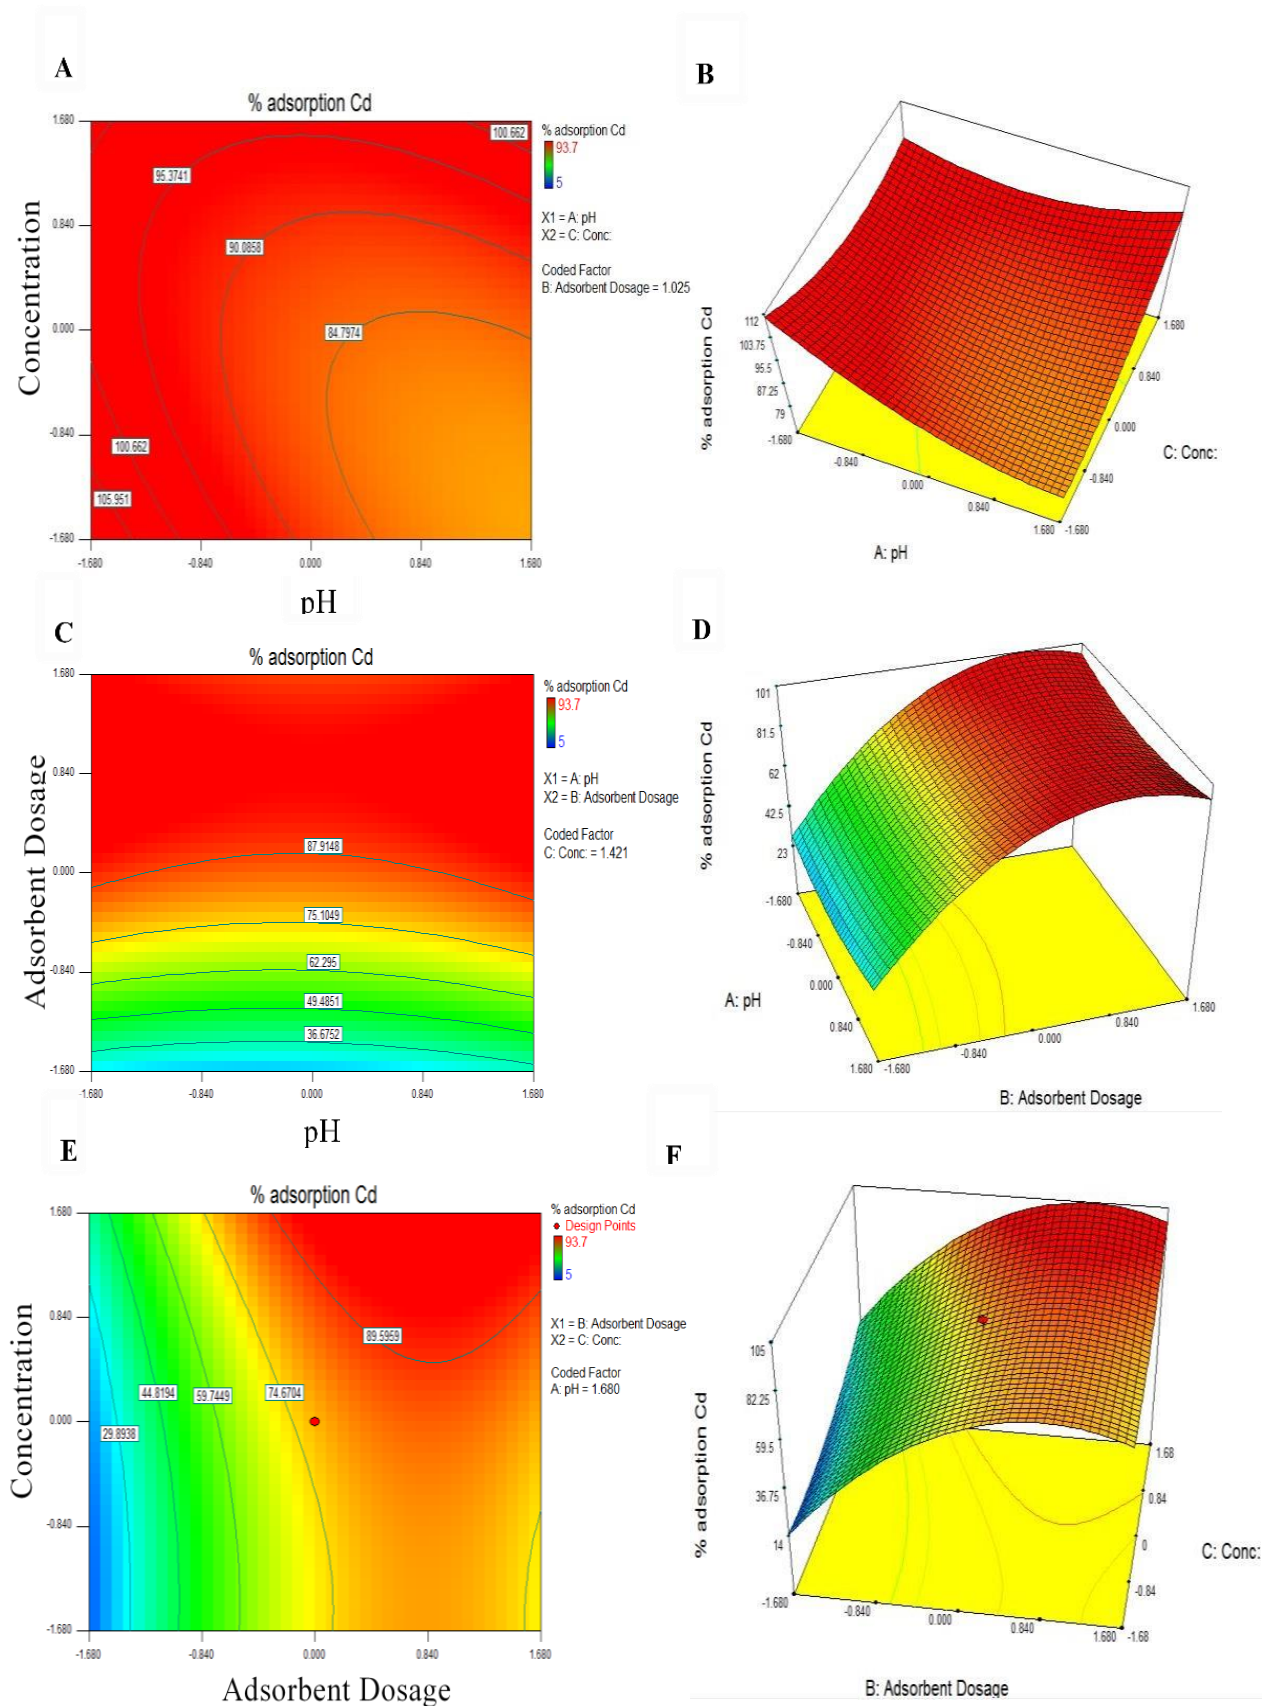

Fig. 2. Response surface plots of desirability for the effects of pH, adsorbent Dosage and metal ion concentration on the % adsorption of  $\text{Cd}^{2+}$

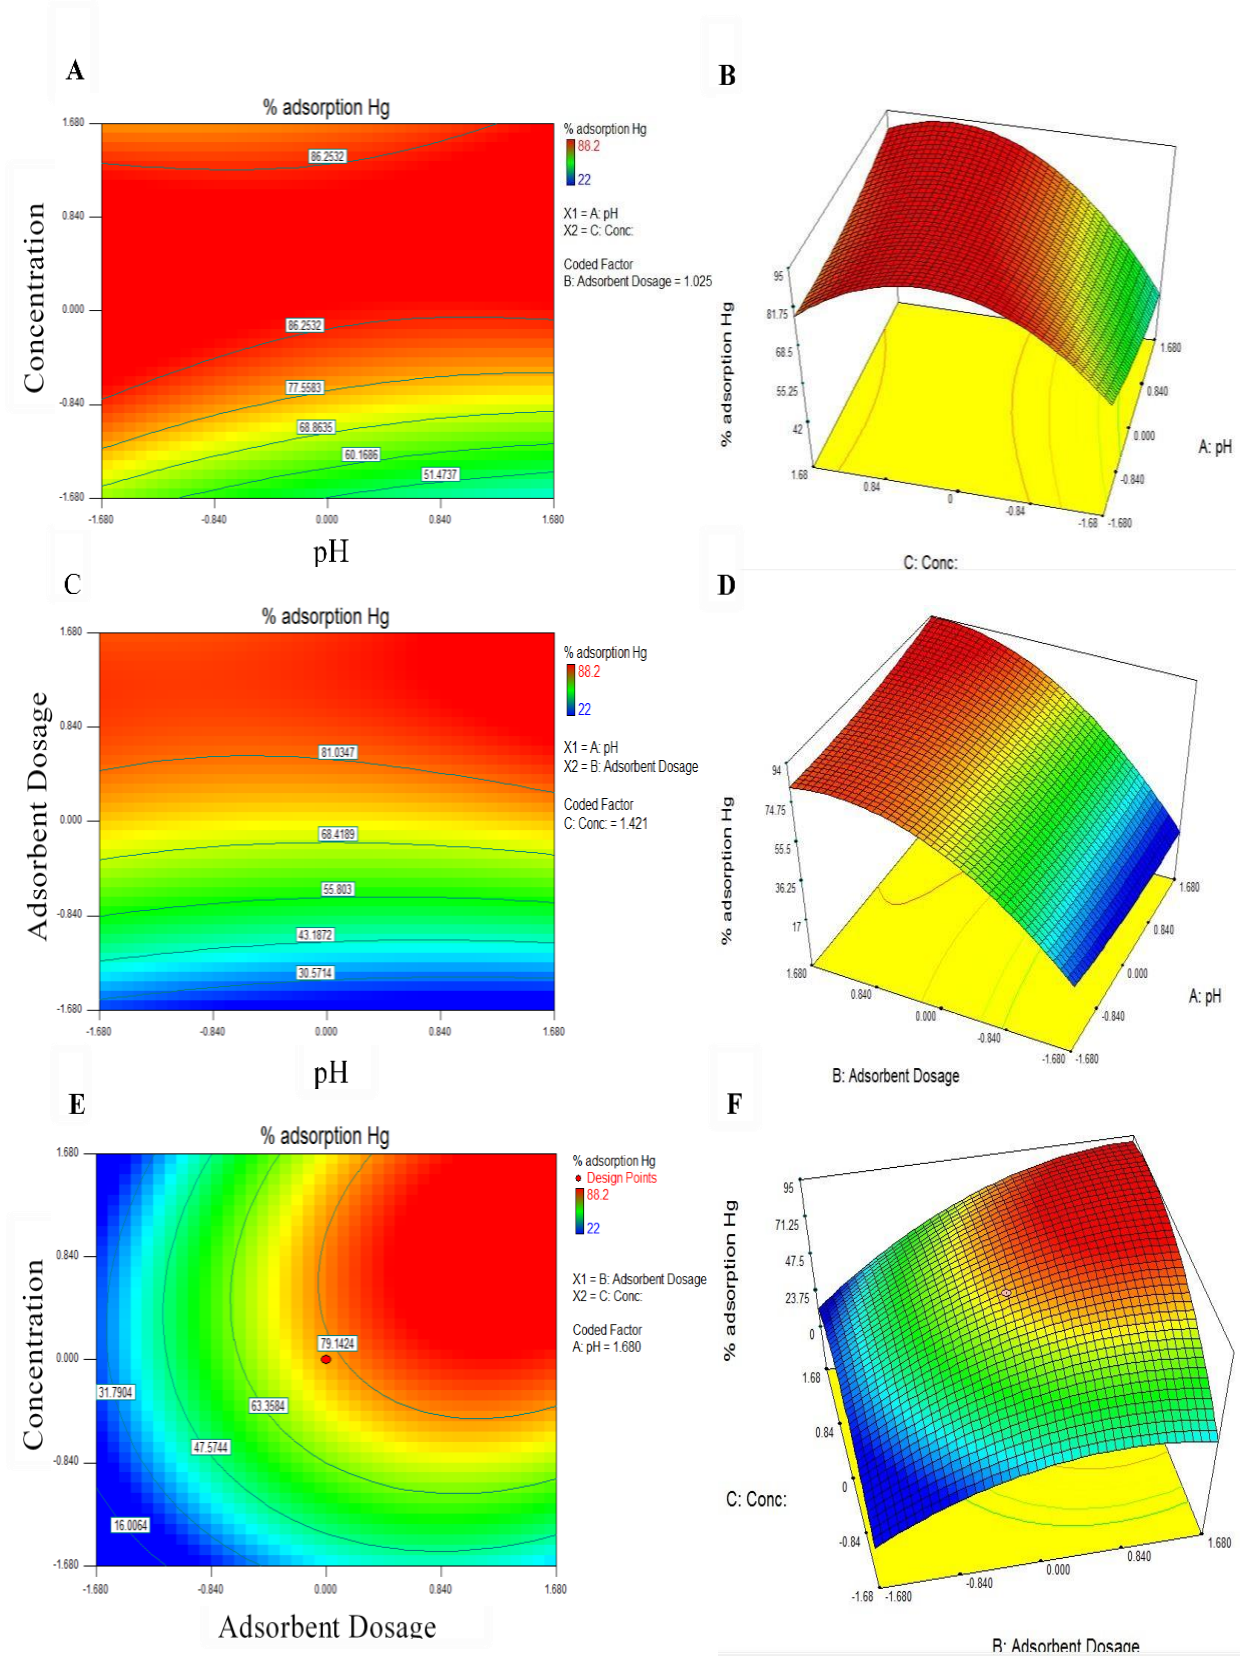

Fig. 3. Response surface plots of desirability for the effects of pH, adsorbent Dosage and metal ion concentration on the % adsorption of  $Hg^{2+}$



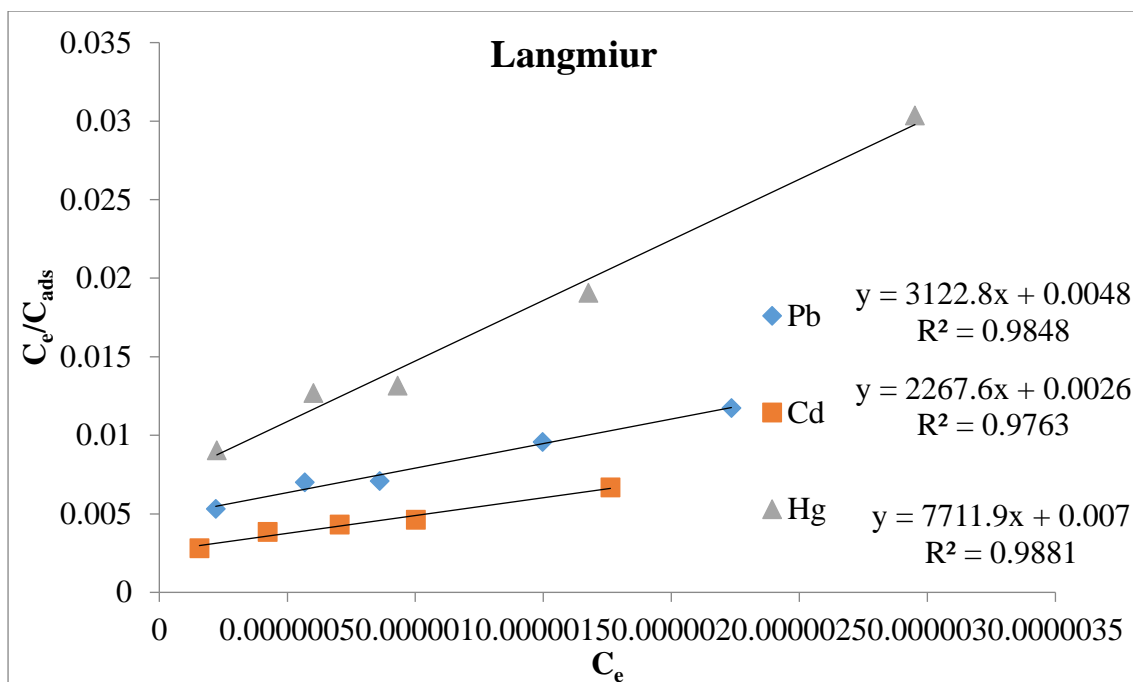

Fig. 4. Langmuir adsorption isotherm of  $Pb^{2+}$ ,  $Cd^{2+}$  and  $Hg^{2+}$  on DEA- C4 resin.

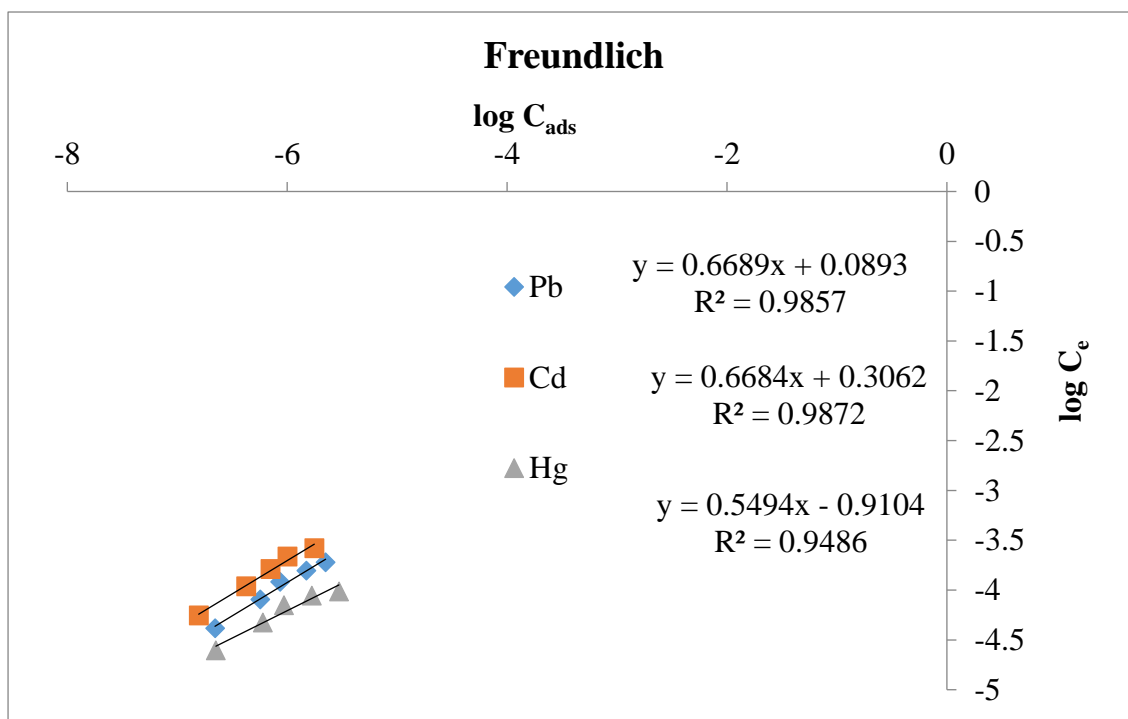

Fig. 5. Freundlich adsorption isotherm of  $Pb^{2+}$ ,  $Cd^{2+}$  and  $Hg^{2+}$  on DEA- C4 resin.

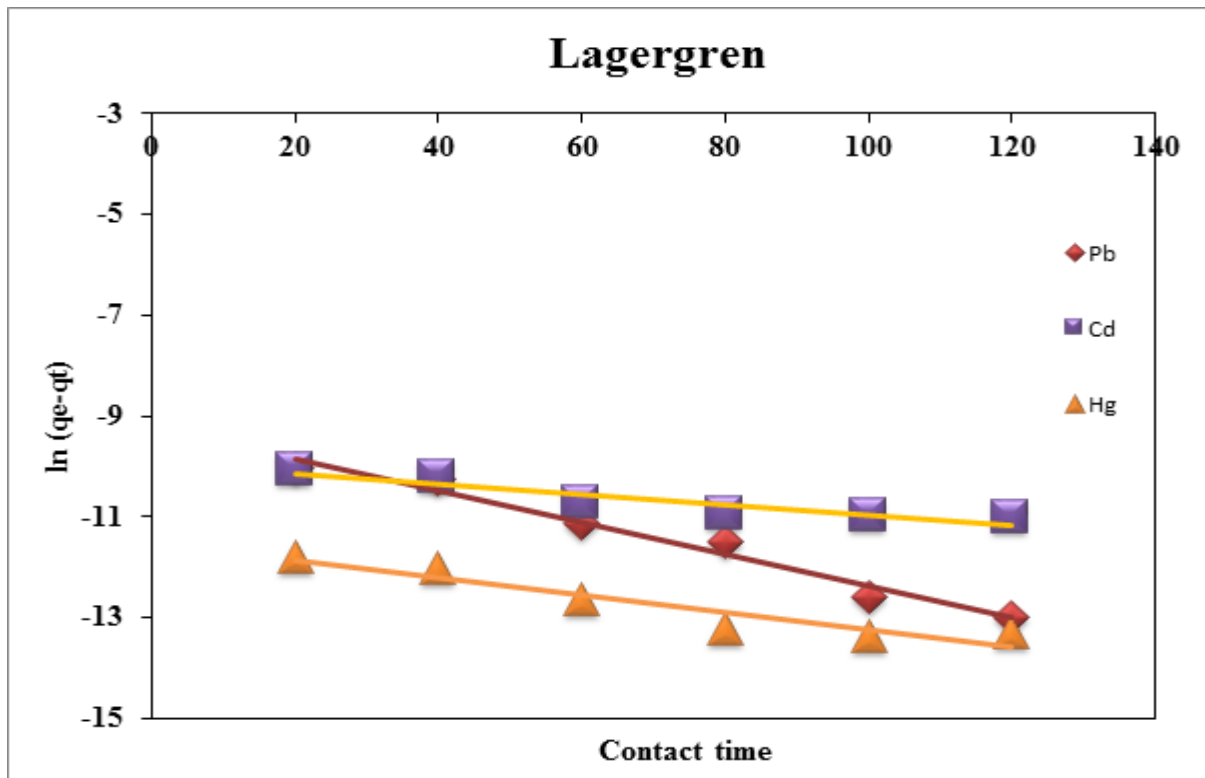

Fig. 6(a). Lagergren model for % adsorption of  $Pb^{2+}$ ,  $Cd^{2+}$  and  $Hg^{2+}$

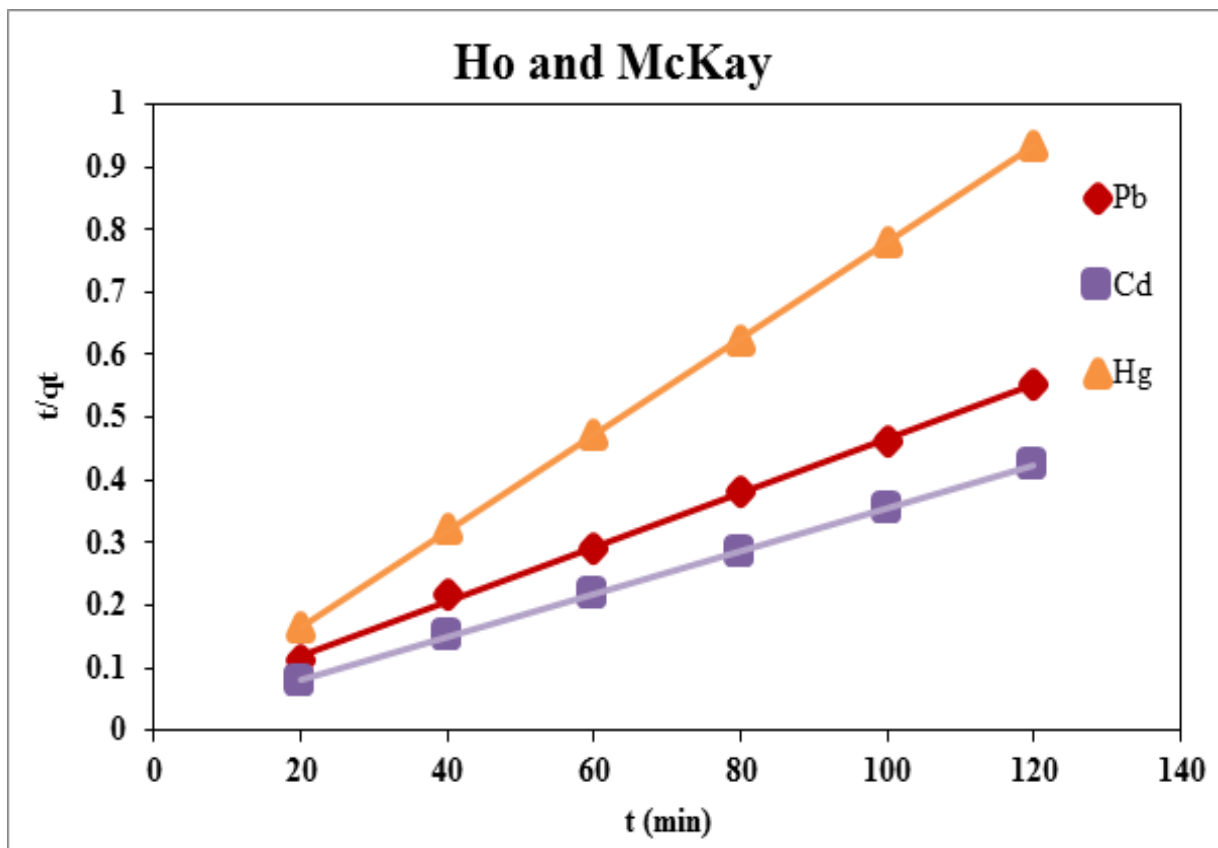

Fig. 6(b). Ho and Mckay model for % adsorption of  $Pb^{2+}$ ,  $Cd^{2+}$  and  $Hg^{2+}$ .

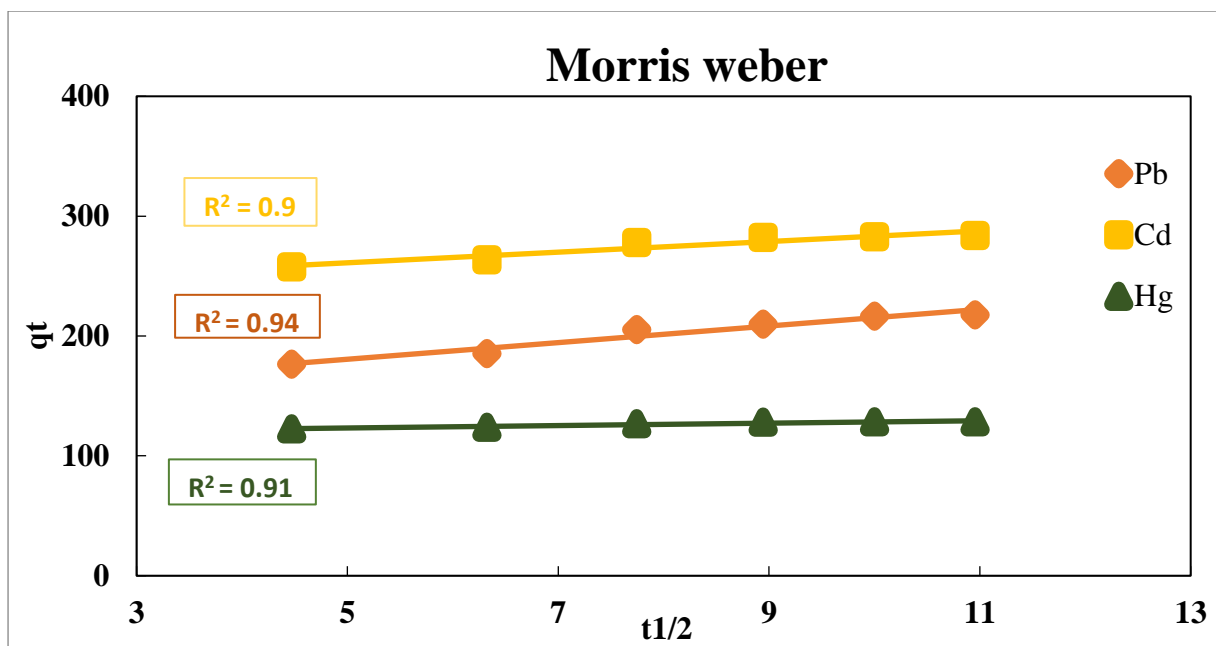

Fig. 6(c) Morris Weber model for % adsorption of  $Pb^{2+}$ ,  $Cd^{2+}$  and  $Hg^{2+}$

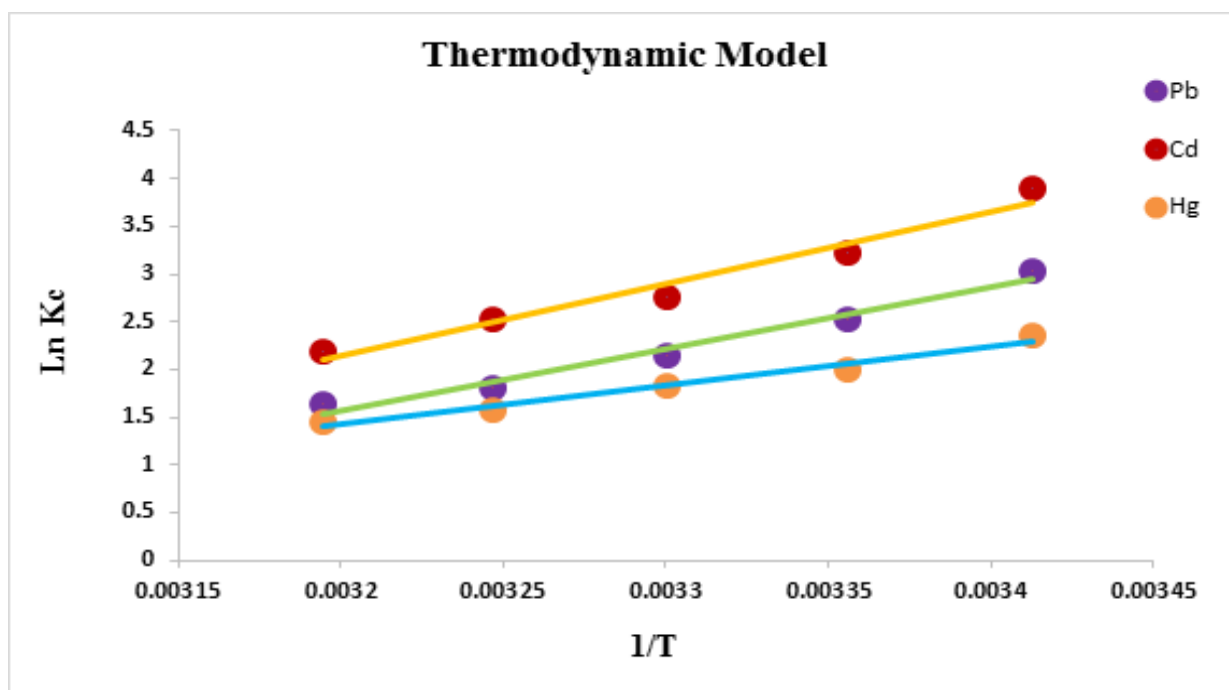

Fig. 7. Effect of temperature on the % adsorption of  $Pb^{2+}$ ,  $Cd^{2+}$  and  $Hg^{2+}$ .
